# Supplementary material for: Euthanasia of Cats by Australian Veterinarians: A Survey of Current Practices
Source: MDPI journal article supplement (doi:10.3390/vetsci10100627), 2023-10-19
Supplement: s1 [file s1]

## Supplementary information

**Table S1.** Survey Questions - Euthanasia of cats by Australian veterinarians: a survey of current practices.

|                                                                                                              |                                                                                                                                                                                                                                                                                                                                                |
|--------------------------------------------------------------------------------------------------------------|------------------------------------------------------------------------------------------------------------------------------------------------------------------------------------------------------------------------------------------------------------------------------------------------------------------------------------------------|
| Have you euthanised a cat in the last 12 months?                                                             | Yes<br>No                                                                                                                                                                                                                                                                                                                                      |
| Non-Emergency Euthanasia                                                                                     |                                                                                                                                                                                                                                                                                                                                                |
| For the most recent, non-emergency euthanasia you performed in a cat, did you use premedication or sedation? | Yes<br>No                                                                                                                                                                                                                                                                                                                                      |
| What was the reasoning behind using a premedication?                                                         | Chemical restraint<br>Clinic's protocols<br>Reduce stress to owner<br>Reduce stress to patient<br>Taught to administer a premedication prior to euthanasia drugs<br>Other (please specify)<br>(Please select all that apply.)                                                                                                                  |
| Please specify your answer.                                                                                  | (Free text response)                                                                                                                                                                                                                                                                                                                           |
| What was the drug used for premedication or sedation prior to the euthanasia you performed most recently?    | Acepromazine<br>Alfaxalone<br>Inhalation anaesthesia<br>Ketamine<br>Medetomidine / Dexmedetomidine<br>Opioids (Methadone, buprenorphine, tramadol, butorphanol, pethidine)<br>Propofol<br>Tiletamine-zolazepam<br>Thiopentone<br>Xylazine<br>Other (please specify)<br>(If you have used a combination of drugs, please select each of these.) |
| Please specify your answer.                                                                                  | (Free text response)                                                                                                                                                                                                                                                                                                                           |
| What was the route of administration for the premedication that you used?                                    | Inhalation<br>Intracardiac injection<br>Intravenous injection<br>Intramuscular injection<br>Intraperitoneal injection<br>Oral administration<br>Subcutaneous injection<br>Other (please specify)<br>(Please select all that apply.)                                                                                                            |
| Please specify your answer.                                                                                  | (Free text response)                                                                                                                                                                                                                                                                                                                           |
| What was the primary method that you used in your most recent non-emergency euthanasia of a cat?             | Pentobarbitone sodium<br>Anaesthetic inhalation<br>Potassium chloride<br>Thiopentone<br>Other (please specify)<br>(If you have used a combination of drugs, please                                                                                                                                                                             |

|                                                                                       |                                                                                                                                                                                                                                                     |
|---------------------------------------------------------------------------------------|-----------------------------------------------------------------------------------------------------------------------------------------------------------------------------------------------------------------------------------------------------|
|                                                                                       | select each of these.)                                                                                                                                                                                                                              |
| Please specify your answer.                                                           | (Free text response)                                                                                                                                                                                                                                |
| What was the route of administration of your chosen euthanasia drug?                  | Intravenous injection<br>Inhalation<br>Intracardiac injection<br>Intramuscular injection<br>Intraperitoneal injection<br>Oral administration<br>Subcutaneous injection<br>Other (please specify)                                                    |
| Please specify your answer.                                                           | (Free text response)                                                                                                                                                                                                                                |
| Was the euthanasia a house call or did it happen at the clinic?                       | House call<br>At the clinic<br>Other (please specify)                                                                                                                                                                                               |
| Please specify your answer.                                                           | (Free text response)                                                                                                                                                                                                                                |
| Was the owner present during the euthanasia?                                          | Yes<br>No                                                                                                                                                                                                                                           |
| How long do you schedule for a routine euthanasia?                                    | 10 minutes<br>20 minutes<br>30 minutes<br>Other (please specify)                                                                                                                                                                                    |
| Please specify your answer.                                                           | (Free text response)                                                                                                                                                                                                                                |
| Were you assisted during the euthanasia?                                              | Yes<br>No                                                                                                                                                                                                                                           |
| Who assisted?                                                                         | Client<br>Veterinary nurse<br>Other (please specify)                                                                                                                                                                                                |
| Please specify your answer.                                                           | (Free text response)                                                                                                                                                                                                                                |
| What adjunctive measures did you take to minimise fear/anxiety/stress in the patient? | Away from other animals<br>Pheromones<br>Dim lighting<br>Longer appointment time<br>Soft bedding<br>Soft music playing<br>Treats<br>Cat only consult room<br>ISFM accreditation<br>Other (please specify)<br>None<br>(Please select all that apply) |
| Please specify your answer.                                                           | (Free text response)                                                                                                                                                                                                                                |
| Did you dispense medication to the owner for the patient prior to the appointment?    | Barbiturates<br>Clonidine<br>Gabapentin<br>Opioids<br>Oral acepromazine<br>Trazodone<br>Other (please specify)<br>None<br>(If you have used a combination of drugs, please                                                                          |

|                                                                                                                 |                                                                                                                                                                                                                                                                                                                                                |
|-----------------------------------------------------------------------------------------------------------------|------------------------------------------------------------------------------------------------------------------------------------------------------------------------------------------------------------------------------------------------------------------------------------------------------------------------------------------------|
|                                                                                                                 | select each of these.)                                                                                                                                                                                                                                                                                                                         |
| Please specify your answer.                                                                                     | (Free text response)                                                                                                                                                                                                                                                                                                                           |
| Emergency Euthanasia                                                                                            |                                                                                                                                                                                                                                                                                                                                                |
| For the last emergency euthanasia performed in a cat in the last 12 months, did you administer a premedication? | Yes<br>No<br>Have not performed                                                                                                                                                                                                                                                                                                                |
| What was the reasoning behind using a premedication?                                                            | Chemical restraint<br>Clinic's protocols<br>Reduce stress to owner<br>Reduce stress to the patient<br>Taught to administer a premedication prior to euthanasia drugs<br>Other (please specify)<br>(Please select all that apply.)                                                                                                              |
| Please specify your answer.                                                                                     | (Free text response)                                                                                                                                                                                                                                                                                                                           |
| What was the drug used for premedication prior to euthanasia under an emergency?                                | Acepromazine<br>Alfaxalone<br>Inhalation anaesthesia<br>Ketamine<br>Medetomidine / Dexmedetomidine<br>Opioids (Methadone, buprenorphine, tramadol, butorphanol, pethidine)<br>Propofol<br>Tiletamine-zolazepam<br>Thiopentone<br>Xylazine<br>Other (please specify)<br>(If you have used a combination of drugs, please select each of these.) |
| Please specify your answer.                                                                                     | (Free text response)                                                                                                                                                                                                                                                                                                                           |
| What was the route of administration for the premedication that you used?                                       | Inhalation<br>Intracardiac injection<br>Intravenous injection<br>Intramuscular injection<br>Intraperitoneal injection<br>Oral administration<br>Subcutaneous injection<br>Other (please specify)<br>(Please select all that apply.)                                                                                                            |
| Please specify your answer.                                                                                     | (Free text response)                                                                                                                                                                                                                                                                                                                           |
| Was the emergency euthanasia a house call or did it happen at the clinic?                                       | House call<br>At the clinic<br>Other (please specify)                                                                                                                                                                                                                                                                                          |
| Please specify your answer                                                                                      | (Free text response)                                                                                                                                                                                                                                                                                                                           |
| Was the owner present during the euthanasia?                                                                    | Yes<br>No                                                                                                                                                                                                                                                                                                                                      |
| Were you assisted during the euthanasia?                                                                        | Yes<br>No                                                                                                                                                                                                                                                                                                                                      |
| Who assisted?                                                                                                   | Client<br>Veterinary nurse                                                                                                                                                                                                                                                                                                                     |

|                                                                                                                             |                                                                                                                                                                                                                                                                                               |
|-----------------------------------------------------------------------------------------------------------------------------|-----------------------------------------------------------------------------------------------------------------------------------------------------------------------------------------------------------------------------------------------------------------------------------------------|
|                                                                                                                             | Other (please specify)                                                                                                                                                                                                                                                                        |
| Please specify your answer.                                                                                                 | (Free text response)                                                                                                                                                                                                                                                                          |
| What adjunctive measures did you take to minimise fear/anxiety/stress in the patient?                                       | Away from other animals<br>Pheromones<br>Dim lighting<br>Longer appointment time<br>Soft bedding<br>Soft music playing<br>Treats<br>Cat only consult room<br>ISFM accreditation<br>Other (please specify)<br>None<br>(Please select all that apply.)                                          |
| Please specify your answer.                                                                                                 | (Free text response)                                                                                                                                                                                                                                                                          |
| Is there anything else you wish to add about your approach to euthanising a cat?                                            | (Free text response)                                                                                                                                                                                                                                                                          |
| Demographics                                                                                                                |                                                                                                                                                                                                                                                                                               |
| Gender:                                                                                                                     | Male<br>Female<br>Other                                                                                                                                                                                                                                                                       |
| Number of years since graduation:                                                                                           | (Free text response) (Please enter a whole number)                                                                                                                                                                                                                                            |
| Please select the most suitable option that best describes your primary workplace.                                          | Animal Shelter practice/charity/NGO<br>Private companion animal practice<br>Private mixed practice<br>Research laboratory<br>Veterinary teaching hospital<br>Other (please specify)                                                                                                           |
| Please specify your answer.                                                                                                 | (Free text response)                                                                                                                                                                                                                                                                          |
| Please select the most suitable option that best describes the geographical location of your workplace.                     | Metropolitan (Major capital cities)<br>Regional (All of the towns, small cities and areas that lie beyond the major capital cities)<br>Rural (Open country and settlements fewer than 2,500 residents)<br>Remote (Places that are considerably out of the way and excluded from civilization) |
| Participant email address collection survey                                                                                 |                                                                                                                                                                                                                                                                                               |
| If you wish to receive the overall results of this study, please provide us with your email address and submit this survey. | (Free text response)                                                                                                                                                                                                                                                                          |

**Table S2.** Descriptive statistics of euthanasia practices of the most recent non-emergency euthanasia of a cat by Australian veterinarians (n = 615)

| Category | Number | Percentage (%) |
|----------|--------|----------------|
|----------|--------|----------------|

|                                                                                                                                                                 |                                                                                                                                                                                                                                                                                                                                   |     |      |
|-----------------------------------------------------------------------------------------------------------------------------------------------------------------|-----------------------------------------------------------------------------------------------------------------------------------------------------------------------------------------------------------------------------------------------------------------------------------------------------------------------------------|-----|------|
| Have you euthanised a cat in the last 12 months? (n = 615)                                                                                                      | Yes                                                                                                                                                                                                                                                                                                                               | 585 | 95.1 |
|                                                                                                                                                                 | No                                                                                                                                                                                                                                                                                                                                | 30  | 4.9  |
| For the most recent, non-emergency euthanasia you performed in a cat, did you use premedication or sedation? (n = 585)                                          | Yes                                                                                                                                                                                                                                                                                                                               | 415 | 71.0 |
|                                                                                                                                                                 | No                                                                                                                                                                                                                                                                                                                                | 170 | 29.0 |
| What was the reasoning behind using a premedication? (n = 415) (Participant could select multiple options)                                                      | Chemical restraint                                                                                                                                                                                                                                                                                                                | 242 | 58.3 |
|                                                                                                                                                                 | Clinic's protocols                                                                                                                                                                                                                                                                                                                | 54  | 13.0 |
|                                                                                                                                                                 | Reduce stress to owner                                                                                                                                                                                                                                                                                                            | 327 | 78.6 |
|                                                                                                                                                                 | Reduce stress to patient                                                                                                                                                                                                                                                                                                          | 388 | 93.3 |
|                                                                                                                                                                 | Taught to administer a premedication prior to euthanasia drugs                                                                                                                                                                                                                                                                    | 32  | 7.7  |
|                                                                                                                                                                 | Other (please specify) (reduce operator stress n=6, minimise adverse effects n=5, analgesia n=3, combination of reasons n=3, no assistant n=2, aggression n=1, anaesthesia for intraorgan injection n=1, "CKD no veins" n=1, "Fear Free certification" n=1, "its what I always do, kinder" n=1, safety n=1, owner's request n=1). | 26  | 6.3  |
| What was the drug used for premedication or sedation prior to the euthanasia you performed most recently? (n = 415) (Participant could select multiple options) | Acepromazine                                                                                                                                                                                                                                                                                                                      | 120 | 28.9 |
|                                                                                                                                                                 | Alfaxalone                                                                                                                                                                                                                                                                                                                        | 61  | 14.7 |
|                                                                                                                                                                 | Inhalation anaesthesia                                                                                                                                                                                                                                                                                                            | 2   | 0.5  |
|                                                                                                                                                                 | Ketamine                                                                                                                                                                                                                                                                                                                          | 31  | 7.5  |
|                                                                                                                                                                 | Medetomidine / Dexmedetomidine                                                                                                                                                                                                                                                                                                    | 61  | 14.7 |
|                                                                                                                                                                 | Opioids (Methadone, buprenorphine, tramadol, butorphanol, pethidine)                                                                                                                                                                                                                                                              | 118 | 28.4 |
|                                                                                                                                                                 | Propofol                                                                                                                                                                                                                                                                                                                          | 20  | 4.8  |
|                                                                                                                                                                 | Tiletamine-zolazepam                                                                                                                                                                                                                                                                                                              | 205 | 49.4 |
|                                                                                                                                                                 | Thiopentone                                                                                                                                                                                                                                                                                                                       | 10  | 2.4  |
|                                                                                                                                                                 | Xylazine                                                                                                                                                                                                                                                                                                                          | 9   | 2.2  |
|                                                                                                                                                                 | Other (please specify) (midazolam n=8, irrelevant n=2, gabapentin n=1, combined acepromazine and pentobarbitone n=1, combined tiletamine/zolazepam with pentobarbitone followed by tiletamine zolazepam with acepromazine n=1, pentobarbitone n=1, local anaesthetic (prilocaine) n=1).                                           | 15  | 3.6  |
| What was the route of administration for the premedication that you used? (n = 415) (Participant could select multiple options)                                 | Inhalation                                                                                                                                                                                                                                                                                                                        | 2   | 0.5  |
|                                                                                                                                                                 | Intracardiac injection                                                                                                                                                                                                                                                                                                            | 1   | 0.2  |
|                                                                                                                                                                 | Intravenous injection                                                                                                                                                                                                                                                                                                             | 115 | 27.7 |
|                                                                                                                                                                 | Intramuscular injection                                                                                                                                                                                                                                                                                                           | 161 | 38.8 |
|                                                                                                                                                                 | Intraperitoneal injection                                                                                                                                                                                                                                                                                                         | 2   | 0.5  |
|                                                                                                                                                                 | Oral administration                                                                                                                                                                                                                                                                                                               | 4   | 0.95 |
|                                                                                                                                                                 | Subcutaneous injection                                                                                                                                                                                                                                                                                                            | 148 | 35.7 |

|                                                                                                                                                           |                                                                                                                                                                                                                                                                                                                                                                                                                                                                                                                               |     |      |
|-----------------------------------------------------------------------------------------------------------------------------------------------------------|-------------------------------------------------------------------------------------------------------------------------------------------------------------------------------------------------------------------------------------------------------------------------------------------------------------------------------------------------------------------------------------------------------------------------------------------------------------------------------------------------------------------------------|-----|------|
|                                                                                                                                                           | Other (please specify)                                                                                                                                                                                                                                                                                                                                                                                                                                                                                                        | 0   | 0    |
| What was the primary method that you used in your most recent non-emergency euthanasia of a cat? (n = 585)<br>(Participant could select multiple options) | Pentobarbitone sodium                                                                                                                                                                                                                                                                                                                                                                                                                                                                                                         | 584 | 99.8 |
|                                                                                                                                                           | Anaesthetic inhalation                                                                                                                                                                                                                                                                                                                                                                                                                                                                                                        | 2   | 0.3  |
|                                                                                                                                                           | Potassium chloride                                                                                                                                                                                                                                                                                                                                                                                                                                                                                                            | 1   | 0.2  |
|                                                                                                                                                           | Thiopentone                                                                                                                                                                                                                                                                                                                                                                                                                                                                                                                   | 3   | 0.5  |
|                                                                                                                                                           | Other (please specify) (firearm n=1)                                                                                                                                                                                                                                                                                                                                                                                                                                                                                          | 0   | 0.9  |
| What was the route of administration of your chosen euthanasia drug? (n = 585)<br>(Participant could only select one option)                              | IV injection                                                                                                                                                                                                                                                                                                                                                                                                                                                                                                                  | 536 | 91.6 |
|                                                                                                                                                           | Inhalation                                                                                                                                                                                                                                                                                                                                                                                                                                                                                                                    | 0   | 0    |
|                                                                                                                                                           | Intracardiac injection                                                                                                                                                                                                                                                                                                                                                                                                                                                                                                        | 15  | 2.6  |
|                                                                                                                                                           | Intramuscular injection                                                                                                                                                                                                                                                                                                                                                                                                                                                                                                       | 1   | 0.2  |
|                                                                                                                                                           | Intraperitoneal injection                                                                                                                                                                                                                                                                                                                                                                                                                                                                                                     | 7   | 1.2  |
|                                                                                                                                                           | Oral administration                                                                                                                                                                                                                                                                                                                                                                                                                                                                                                           | 0   | 0.0  |
|                                                                                                                                                           | Subcutaneous injection                                                                                                                                                                                                                                                                                                                                                                                                                                                                                                        | 0   | 0.0  |
|                                                                                                                                                           | Other (please specify) (intra-renal n=23, hepatic n=1, nil drugs n=1, irrelevant n=1).                                                                                                                                                                                                                                                                                                                                                                                                                                        | 26  | 4.4  |
| Was the euthanasia a house call or did it happen at the clinic? (n = 585)<br>(Participant could only select one option)                                   | House call                                                                                                                                                                                                                                                                                                                                                                                                                                                                                                                    | 49  | 8.4  |
|                                                                                                                                                           | At the clinic                                                                                                                                                                                                                                                                                                                                                                                                                                                                                                                 | 531 | 90.8 |
|                                                                                                                                                           | Other (please specify) (shelter or pound n=5)                                                                                                                                                                                                                                                                                                                                                                                                                                                                                 | 5   | 0.85 |
| Was the owner present during the euthanasia? (n = 585)                                                                                                    | Yes                                                                                                                                                                                                                                                                                                                                                                                                                                                                                                                           | 513 | 87.7 |
|                                                                                                                                                           | No                                                                                                                                                                                                                                                                                                                                                                                                                                                                                                                            | 72  | 12.3 |
| How long do you schedule for a routine euthanasia? (n = 585)<br>(Participant could only select one option)                                                | 10 minutes                                                                                                                                                                                                                                                                                                                                                                                                                                                                                                                    | 22  | 3.8  |
|                                                                                                                                                           | 20 minutes                                                                                                                                                                                                                                                                                                                                                                                                                                                                                                                    | 113 | 19.3 |
|                                                                                                                                                           | 30 minutes                                                                                                                                                                                                                                                                                                                                                                                                                                                                                                                    | 345 | 59.0 |
|                                                                                                                                                           | 40 minutes                                                                                                                                                                                                                                                                                                                                                                                                                                                                                                                    | 28  | 4.8  |
|                                                                                                                                                           | 60 minutes                                                                                                                                                                                                                                                                                                                                                                                                                                                                                                                    | 23  | 3.9  |
|                                                                                                                                                           | Other (please specify) (10-30 mins n=1, 15 minutes n=4, 30 minutes with nurse and 15 minutes with veterinarian n=1, 15-20 minutes n=1, 30-45 minutes n=1, 30-60 minutes n=1, 40-60 minutes n=3, 45 minutes n=8, 40-60 minutes n=1, 90 minutes n=1, daily time scheduled for euthanasia of shelter animals n=1, do not schedule appointments (walk in appointments or emergencies) n=9, minimum 30 minutes but owner can stay as long as they want n=1, unspecified n=4, aggressive feral cat dropped off n=1, irrelevant n=1. | 39  | 6.7  |
|                                                                                                                                                           | Unlimited                                                                                                                                                                                                                                                                                                                                                                                                                                                                                                                     | 15  | 2.6  |
| Were you assisted during the euthanasia? (n = 585)                                                                                                        | Yes                                                                                                                                                                                                                                                                                                                                                                                                                                                                                                                           | 413 | 70.6 |
|                                                                                                                                                           | No                                                                                                                                                                                                                                                                                                                                                                                                                                                                                                                            | 172 | 29.4 |
| Who assisted? (n = 413)                                                                                                                                   | Client                                                                                                                                                                                                                                                                                                                                                                                                                                                                                                                        | 3   | 0.7  |
|                                                                                                                                                           | Veterinary nurse                                                                                                                                                                                                                                                                                                                                                                                                                                                                                                              | 405 | 97.8 |

|                                                                                                 |                                                                                                                                                                                                                                                                                                                                                                                                                                                                                                                                                                                                                                                                                                                                                          |     |      |
|-------------------------------------------------------------------------------------------------|----------------------------------------------------------------------------------------------------------------------------------------------------------------------------------------------------------------------------------------------------------------------------------------------------------------------------------------------------------------------------------------------------------------------------------------------------------------------------------------------------------------------------------------------------------------------------------------------------------------------------------------------------------------------------------------------------------------------------------------------------------|-----|------|
| (Participant could only select one option)                                                      | Other (please specify) (animal attendant or shelter staff n=3, veterinary student n=2).                                                                                                                                                                                                                                                                                                                                                                                                                                                                                                                                                                                                                                                                  | 5   | 1.2  |
| What adjunctive measures did you take to minimise fear/anxiety/stress in the patient? (n = 585) | Away from other animals                                                                                                                                                                                                                                                                                                                                                                                                                                                                                                                                                                                                                                                                                                                                  | 507 | 86.7 |
| (Participant could select multiple options)                                                     | Pheromones                                                                                                                                                                                                                                                                                                                                                                                                                                                                                                                                                                                                                                                                                                                                               | 207 | 35.4 |
|                                                                                                 | Dim lighting                                                                                                                                                                                                                                                                                                                                                                                                                                                                                                                                                                                                                                                                                                                                             | 128 | 22.0 |
|                                                                                                 | Longer appointment time                                                                                                                                                                                                                                                                                                                                                                                                                                                                                                                                                                                                                                                                                                                                  | 355 | 60.7 |
|                                                                                                 | Soft bedding                                                                                                                                                                                                                                                                                                                                                                                                                                                                                                                                                                                                                                                                                                                                             | 429 | 73.3 |
|                                                                                                 | Soft music playing                                                                                                                                                                                                                                                                                                                                                                                                                                                                                                                                                                                                                                                                                                                                       | 22  | 3.8  |
|                                                                                                 | Treats                                                                                                                                                                                                                                                                                                                                                                                                                                                                                                                                                                                                                                                                                                                                                   | 81  | 13.8 |
|                                                                                                 | Cat only consult room                                                                                                                                                                                                                                                                                                                                                                                                                                                                                                                                                                                                                                                                                                                                    | 141 | 24.1 |
|                                                                                                 | ISFM accreditation                                                                                                                                                                                                                                                                                                                                                                                                                                                                                                                                                                                                                                                                                                                                       | 33  | 5.6  |
|                                                                                                 | Other (please specify) (private quiet room away from clinical activity n=5, allow owner to hold the cat n=5, gentle handling n=5, encourage owner to stay n=4, apply local anaesthetic prior to intravenous catheterization n=3, animal's own bedding n=2, aromatherapy or essential oils n=2, cover cat carrier n=2, candle in room n=2, housecall n=2, accommodate owner requests n=1, gentle speech n=1, calm approach n=1, minimise waiting time n=1, put up notice in reception n=1, place catheter away from owner n=1, place catheter with extension port n=1, pre-med cat where they are lying so not to disturb them n=1, sensible animal handling n=1, talk to owner to encourage a positive state of mind which may influence their cat n=1). | 42  | 7.2  |
|                                                                                                 | None                                                                                                                                                                                                                                                                                                                                                                                                                                                                                                                                                                                                                                                                                                                                                     | 26  | 4.4  |
| Did you dispense medication to the owner for the patient prior to the appointment? (n = 585)    | Barbiturates                                                                                                                                                                                                                                                                                                                                                                                                                                                                                                                                                                                                                                                                                                                                             | 1   | 0.2  |
| (Participant could select multiple options)                                                     | Clonidine                                                                                                                                                                                                                                                                                                                                                                                                                                                                                                                                                                                                                                                                                                                                                | 0   | 0.0  |
|                                                                                                 | Gabapentin                                                                                                                                                                                                                                                                                                                                                                                                                                                                                                                                                                                                                                                                                                                                               | 51  | 8.7  |
|                                                                                                 | Opioids                                                                                                                                                                                                                                                                                                                                                                                                                                                                                                                                                                                                                                                                                                                                                  | 2   | 0.3  |
|                                                                                                 | Oral acepromazine                                                                                                                                                                                                                                                                                                                                                                                                                                                                                                                                                                                                                                                                                                                                        | 1   | 0.2  |
|                                                                                                 | Trazodone                                                                                                                                                                                                                                                                                                                                                                                                                                                                                                                                                                                                                                                                                                                                                | 0   | 0.0  |
|                                                                                                 | Other (please specify)                                                                                                                                                                                                                                                                                                                                                                                                                                                                                                                                                                                                                                                                                                                                   | 0   | 0.0  |
|                                                                                                 | None                                                                                                                                                                                                                                                                                                                                                                                                                                                                                                                                                                                                                                                                                                                                                     | 529 | 90.4 |

**Table S3.** Descriptive statistics of euthanasia practices of the most recent emergency euthanasia of a cat by Australian veterinarians (n = 585)

|                                                                                                                           | Category           | Number | Percentage (%) |
|---------------------------------------------------------------------------------------------------------------------------|--------------------|--------|----------------|
| For the last emergency euthanasia performed in a cat in the last 12 months, did you administer a premedication? (n = 585) | Yes                | 242    | 41.4           |
| (Participant could only select one option)                                                                                | No                 | 220    | 37.6           |
|                                                                                                                           | Have not performed | 123    | 21.0           |

|                                                                                                                                           |                                                                                                                                                                              |     |      |
|-------------------------------------------------------------------------------------------------------------------------------------------|------------------------------------------------------------------------------------------------------------------------------------------------------------------------------|-----|------|
| What was the reasoning behind using a premedication? (n = 242)<br>(Participant could select multiple options)                             | Chemical restraint                                                                                                                                                           | 139 | 57.4 |
|                                                                                                                                           | Clinic's protocols                                                                                                                                                           | 24  | 9.9  |
|                                                                                                                                           | Reduce stress to owner                                                                                                                                                       | 163 | 66.5 |
|                                                                                                                                           | Reduce stress to the patient                                                                                                                                                 | 218 | 90.1 |
|                                                                                                                                           | Taught to administer a premedication prior to euthanasia drugs                                                                                                               | 11  | 4.5  |
| What was the drug used for premedication prior to euthanasia under an emergency? (n = 242)<br>(Participant could select multiple options) | Other (please specify) (Analgesia n=14, reduce operator stress n=4, cat in respiratory distress n=3, safety n=2, to facilitate intravenous access in dehydrated kitten n=1). | 24  | 9.9  |
|                                                                                                                                           | Acepromazine                                                                                                                                                                 | 43  | 17.8 |
|                                                                                                                                           | Alfaxalone                                                                                                                                                                   | 45  | 18.6 |
|                                                                                                                                           | Inhalation anaesthesia                                                                                                                                                       | 7   | 2.9  |
|                                                                                                                                           | Ketamine                                                                                                                                                                     | 21  | 8.7  |
|                                                                                                                                           | Medetomidine / Dexmedetomidine                                                                                                                                               | 35  | 14.4 |
|                                                                                                                                           | Opioids (Methadone, buprenorphine, tramadol, butorphanol, pethidine)                                                                                                         | 107 | 44.0 |
|                                                                                                                                           | Propofol                                                                                                                                                                     | 13  | 5.4  |
|                                                                                                                                           | Tiletamine-zolazepam                                                                                                                                                         | 87  | 35.9 |
|                                                                                                                                           | Thiopentone                                                                                                                                                                  | 8   | 3.3  |
| What was the route of administration for the premedication that you used? (n = 242)<br>(Participant could select multiple options)        | Xylazine                                                                                                                                                                     | 5   | 2.1  |
|                                                                                                                                           | Other (please specify) (Midazolam n=1)                                                                                                                                       | 1   | 0.4  |
|                                                                                                                                           | Inhalation                                                                                                                                                                   | 8   | 3.3  |
|                                                                                                                                           | Intracardiac injection                                                                                                                                                       | 2   | 0.8  |
|                                                                                                                                           | Intravenous injection                                                                                                                                                        | 92  | 38.0 |
|                                                                                                                                           | Intramuscular injection                                                                                                                                                      | 107 | 44.2 |
|                                                                                                                                           | Intraperitoneal injection                                                                                                                                                    | 2   | 0.8  |
|                                                                                                                                           | Oral administration                                                                                                                                                          | 0   | 0.0  |
| Was the emergency euthanasia a house call or did it happen at the clinic? (n = 242)<br>(Participant could only select one option)         | Subcutaneous injection                                                                                                                                                       | 45  | 18.6 |
|                                                                                                                                           | Other (please specify) (intra-renal n=2)                                                                                                                                     | 2   | 0.8  |
|                                                                                                                                           | House call                                                                                                                                                                   | 13  | 5.4  |
|                                                                                                                                           | At the clinic                                                                                                                                                                | 229 | 94.6 |
| Was the owner present during the euthanasia? (n = 242)                                                                                    | Other (please specify)                                                                                                                                                       | 0   | 0.0  |
|                                                                                                                                           | Yes                                                                                                                                                                          | 197 | 81.4 |
| Were you assisted during the euthanasia? (n = 242)                                                                                        | No                                                                                                                                                                           | 45  | 18.6 |
|                                                                                                                                           | Yes                                                                                                                                                                          | 168 | 69.4 |
| Who assisted? (n = 168)<br>(Participant could only select one option)                                                                     | No                                                                                                                                                                           | 74  | 30.6 |
|                                                                                                                                           | Client                                                                                                                                                                       | 5   | 3.0  |
|                                                                                                                                           | Veterinary nurse                                                                                                                                                             | 162 | 96.4 |
|                                                                                                                                           | Other (please specify) (my daughter, n=1).                                                                                                                                   | 1   | 0.6  |
| What adjunctive measures did you take to minimise                                                                                         | Away from other animals                                                                                                                                                      | 206 | 85.2 |
|                                                                                                                                           | Pheromones                                                                                                                                                                   | 78  | 32.1 |
|                                                                                                                                           | Dim lighting                                                                                                                                                                 | 48  | 19.8 |



|                                                                                              |                                                                                                                                                                                                                                                                                                                                                                    |     |      |
|----------------------------------------------------------------------------------------------|--------------------------------------------------------------------------------------------------------------------------------------------------------------------------------------------------------------------------------------------------------------------------------------------------------------------------------------------------------------------|-----|------|
| fear/anxiety/stress in the patient? (n = 242)<br>(Participant could select multiple options) | Longer appointment time                                                                                                                                                                                                                                                                                                                                            | 116 | 47.7 |
|                                                                                              | Soft bedding                                                                                                                                                                                                                                                                                                                                                       | 165 | 67.9 |
|                                                                                              | Soft music playing                                                                                                                                                                                                                                                                                                                                                 | 7   | 2.9  |
|                                                                                              | Treats                                                                                                                                                                                                                                                                                                                                                             | 24  | 9.9  |
|                                                                                              | Cat only consultation room                                                                                                                                                                                                                                                                                                                                         | 44  | 18.1 |
|                                                                                              | ISFM accreditation                                                                                                                                                                                                                                                                                                                                                 | 11  | 4.9  |
|                                                                                              | Other (please specify) (aromatherapy or essential oils n=2, gentle handling n=2, owner present n=2, perform euthanasia quickly n=2, analgesia n=1, candle in the room n=1, apply local anaesthetic prior to intravenous catheterization n=1, gentle handling and conversation n=1, minimal handling with use of towels n=1, under general anaesthesia already n=1) | 14  | 5.8  |
|                                                                                              | None                                                                                                                                                                                                                                                                                                                                                               | 17  | 7.0  |
